# Supplementary material for: The REthinking Clinical Trials Program Retreat 2023: Creating Partnerships to Optimize Quality Cancer Care
Source: MDPI journal article supplement (doi:10.3390/curroncol31030104), 2024-03-06
Supplement: s1 [file s1]

## Supplementary Materials

**Table S1: REaCT Study Advisory Guidelines**

|                                                                                                                                                |   |
|------------------------------------------------------------------------------------------------------------------------------------------------|---|
| <b>Collaboration &amp; implication in the REaCT program by the PIs</b>                                                                         | √ |
| Actively participate in other REaCT trials                                                                                                     |   |
| Assist to quarterly study oversight meetings                                                                                                   |   |
| Provide regular update at the REaCT Program team meeting (attend 1x/ month and written communication weekly)                                   |   |
| <b>Pragmatic Design</b>                                                                                                                        | √ |
| Integrative consent model                                                                                                                      |   |
| Clinical equipoise of 2 standard interventions                                                                                                 |   |
| No additional visits than standard of care                                                                                                     |   |
| Inclusive eligibility criteria (limited number to reflect real-world-population)                                                               |   |
| <b>Data collection</b>                                                                                                                         | √ |
| Patient portal collecting PROs                                                                                                                 |   |
| Limited additional data collection outside standard practice (limited adverse events, special events of interest, concurrent meds of interest) |   |
| Reasonable follow up window                                                                                                                    |   |
| Electronic database                                                                                                                            |   |
| <b>Resources</b>                                                                                                                               | √ |
| No additional tests (blood test, imaging, pathology)                                                                                           |   |
| No impact or coordination with other departments/services (CTU, radiology)                                                                     |   |
| Limited number of participating sites that can commit to target accrual                                                                        |   |
| Study timing and workload is feasible with REaCT Program                                                                                       |   |
| <b>Accrual</b>                                                                                                                                 | √ |
| Reasonable accrual rate (target 2 years) with interim accrual rate target at 1 year to proceed                                                 |   |
| Multi-site study TOH should be able to accrue at least 60% of the sample size                                                                  |   |
| <b>Funding</b>                                                                                                                                 | √ |
| Funding obtained by PI (eg. grant, donation)                                                                                                   |   |
| Budget approved by REaCT Program prior to funding application                                                                                  |   |
| <b>Trial Impact</b>                                                                                                                            | √ |
| Improve patient care and/or resources (PROs, economic impact)                                                                                  |   |
| Change clinical practice                                                                                                                       |   |
| Must include a feasible KT plan (conference, manuscript, social media)                                                                         |   |
